# Supplementary material for: Oxidized LDL-induced JAB1 influences NF-κB independent inflammatory signaling in human macrophages during foam cell formation
Source: PubMed Central journal article supplement (PMC5297127; doi:10.1186/s12929-017-0320-5), 2017-02-07
Supplement: 12929_2017_320_MOESM1_ESM.pdf [file 12929_2017_320_MOESM1_ESM.pdf]

## Additional file 1

Antibodies used in this study.

| Antigen                                   | Antibody name                                                   | Cat. no.    | Company                                    |
|-------------------------------------------|-----------------------------------------------------------------|-------------|--------------------------------------------|
| Alpha Tubulin                             | Polyclonal rabbit anti- $\alpha$ -Tubulin                       | ab4074      | Abcam plc., Cambridge, UK                  |
| CD68                                      | monoclonal rat anti-CD68                                        | MCA1957     | AbD Serotec, Kidlington, UK                |
| I $\kappa$ -B $\alpha$ [E130]             | monoclonal rabbit anti-I $\kappa$ -B $\alpha$ [E130]            | ab32518     | Abcam plc., Cambridge, UK                  |
| JAB1[2A10.8]                              | Monoclonal mouse anti-JAB1[2A10.8]                              | GTX70203    | GeneTex, Irvine, CA, USA                   |
| NF- $\kappa$ B p65 (C-20)                 | polyclonal goat anti- NF- $\kappa$ B p65 (C-20)                 | sc-372-G    | Santa Cruz Biotechnology Inc.; Dallas, USA |
| p38 MAPK                                  | Polyclonal rabbit anti-p38 MAPK                                 | 9212        |                                            |
| Phospho-p38 MAPK (Thr180/ Try182) (28B10) | Monoclonal mouse anti-Phospho-p38 MAPK (Thr180/ Try182) (28B10) | 9216        | Cell signaling, Cambridge, UK              |
| IKK $\beta$ (D30C6)                       | Monoclonal rabbit anti-IKK $\beta$ (D30C6)                      | 8943        |                                            |
| <b>Secondary Antibody</b>                 |                                                                 |             |                                            |
| Goat-anti-mouse IgG (H+L)-Cy2             |                                                                 | 115-225-003 |                                            |
| Goat-anti-mouse IgG (H+L)-Cy3             |                                                                 | 115-165-146 | Dianova GmbH, Hamburg, Germany             |
| Goat-anti-rabbit IgG (H+L)-Cy3            |                                                                 | 111-165-003 |                                            |
| Goat-anti-rat IgG HRP-Cy3                 |                                                                 | STAR72      | AbD Serotec, Kidlington, UK                |
