# Supplementary material for: Oxidized LDL-induced JAB1 influences NF-κB independent inflammatory signaling in human macrophages during foam cell formation
Source: PubMed Central journal article supplement (PMC5297127; doi:10.1186/s12929-017-0320-5), 2017-02-07
Supplement: 12929_2017_320_MOESM2_ESM.pdf [file 12929_2017_320_MOESM2_ESM.pdf]

**Additional file 2**

Primers used in this study.

| <b>Gene symbol</b>       | <b>Detected transcript</b> | <b>amplicon length</b> | <b>Cat. no.:</b> |
|--------------------------|----------------------------|------------------------|------------------|
| <b>Reference Genes</b>   |                            |                        |                  |
| RPLP0                    | NM_001002,<br>NM_053275    | 170bp                  | QT01839887       |
| TBP                      | NM_001172085,<br>NM_003194 | 132bp                  | QT00000721       |
| B2M                      | NM_004048                  | 98bp                   | QT00088935       |
| <b>Genes of Interest</b> |                            |                        |                  |
| TNF- $\alpha$            | NM_000594                  | 98bp                   | QT00029162       |
| IL6                      | NM_000600                  | 107bp                  | QT00083720       |
