# Supplementary material for: Oxidized LDL-induced JAB1 influences NF-κB independent inflammatory signaling in human macrophages during foam cell formation
Source: PubMed Central journal article supplement (PMC5297127; doi:10.1186/s12929-017-0320-5), 2017-02-07
Supplement: 12929_2017_320_MOESM3_ESM.pdf [file 12929_2017_320_MOESM3_ESM.pdf]

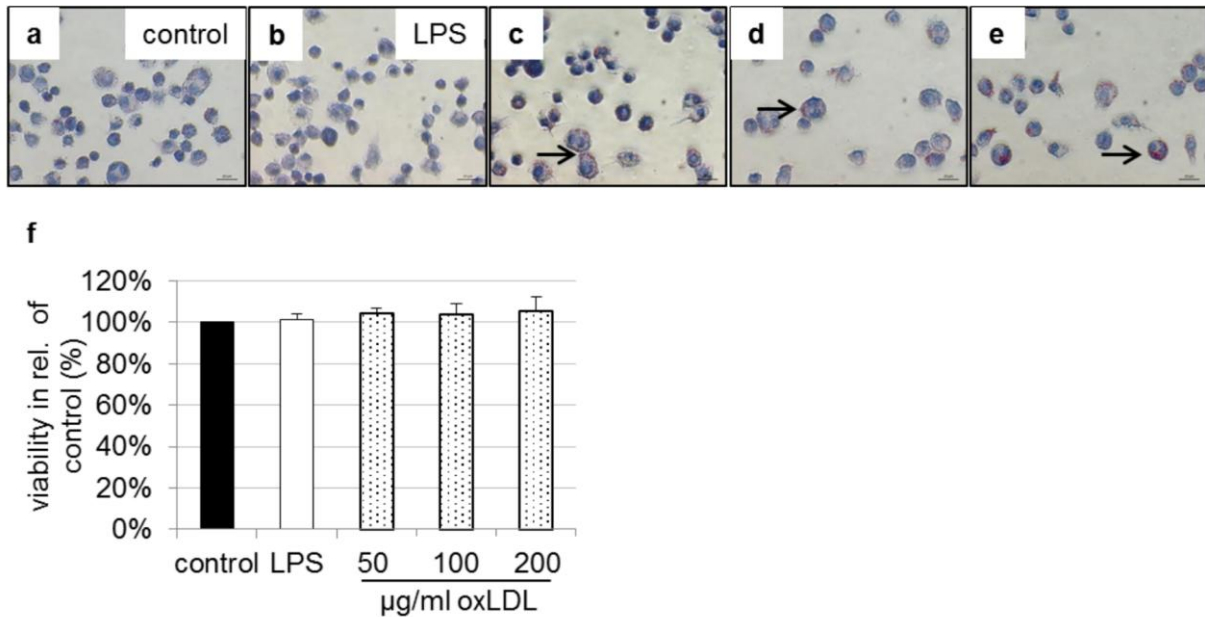

**Figure S1: OxLDL influence JAB1 protein expression and foam cell formation in differentiated human MΦ.** (a – e) PMA-differentiated human U937 MΦ were incubated (4h) with (a) medium alone (= control), (b) 0.1 μg/ml LPS, (c) 50 μg/ml, (d) 100 μg/ml or (e) 200 μg/ml oxLDL. Cells were stained with OilRedO (ORO) and evaluated by interference light microscopy. Black arrows indicate cells containing lipid droplets identified by ORO. Bars: 20 μm. (f) Viability of MΦ after incubation (4h) with oxLDL (50 μg/ml, 100 μg/ml, 200 μg/ml) or LPS. Values (in % viability of cells without treatment [=control; =100% viability]) are given as mean + SEM; n=3 independent experiments.
