# Supplementary material for: Oxidized LDL-induced JAB1 influences NF-κB independent inflammatory signaling in human macrophages during foam cell formation
Source: PubMed Central journal article supplement (PMC5297127; doi:10.1186/s12929-017-0320-5), 2017-02-07
Supplement: 12929_2017_320_MOESM4_ESM.pdf [file 12929_2017_320_MOESM4_ESM.pdf]

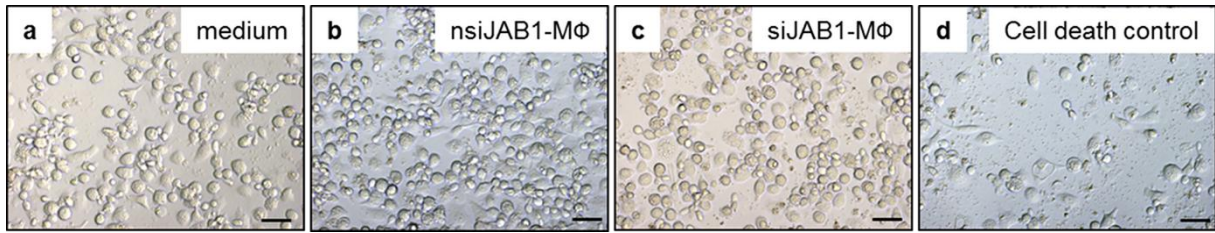

**Additional file 4: Knock-down of JAB1 in human MΦ.** PMA-differentiated human U937 MΦ were treated with HiPerfect Transfection Reagent (medium) (a), transfected with negative siRNA (nsiJAB1-MΦ) (b), siRNA JAB1 (siJAB1-MΦ) (c), or positive siRNA (cell death control) (d) for 48h. Representative images results from 5 independent experiments are shown. Bars: 20μm
